# Supplementary material for: Metformin prevents age-associated ovarian fibrosis by modulating the immune landscape in female mice
Source: PubMed Central journal article supplement — Sci Adv. 2022 Sep 2;8(35):eabq1475. doi: 10.1126/sciadv.abq1475 (PMC10848964; doi:10.1126/sciadv.abq1475), 2022-09-02
Supplement: sciadv.abq1475_sm.pdf [file sciadv.abq1475_sm.pdf]

Supplementary Materials for

**Metformin prevents age-associated ovarian fibrosis by modulating the immune landscape in female mice**

David A. Landry *et al.*

Corresponding author: Barbara C. Vanderhyden, [bvanderhyden@ohri.ca](mailto:bvanderhyden@ohri.ca)

*Sci. Adv.* **8**, eabq1475 (2022)  
DOI: 10.1126/sciadv.abq1475

**The PDF file includes:**

Figs. S1 to S3  
Table S1  
Legends for tables S2 to S5

**Other Supplementary Material for this manuscript includes the following:**

Tables S2 to S5

## Supplementary Materials:

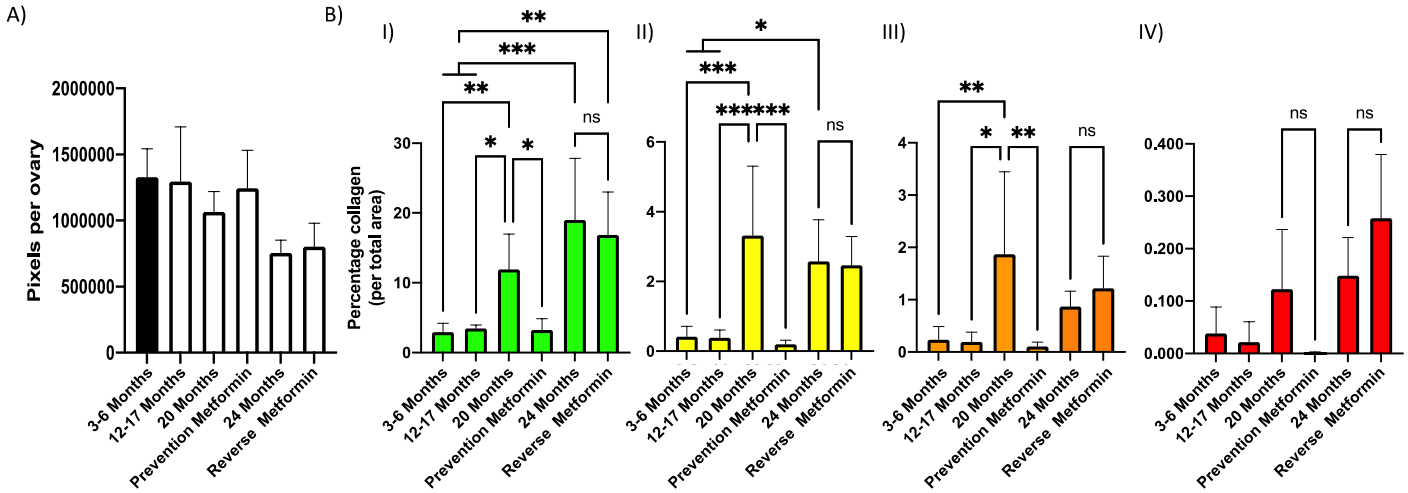

### Supplemental Figure 1: Histological analysis of PSR-POL staining pixels and thickness

(A) The average number of total pixels for each whole ovary was analyzed by PSR-POL imaging. (B) Quantification of each HUE pixel color group, (I) green (thin fibers), (II) yellow, (III) orange, and (IV) red (thick fibers) pixels in association with age and treatment. Total positive pixels were normalized to total pixel count and averaged within each group. Data are means  $\pm$  SEM, (ns=notsignificant, \* $P$ <0.05, \*\* $P$ <0.01, \*\*\* $P$ <0.001).

A) Senescence Core Genes

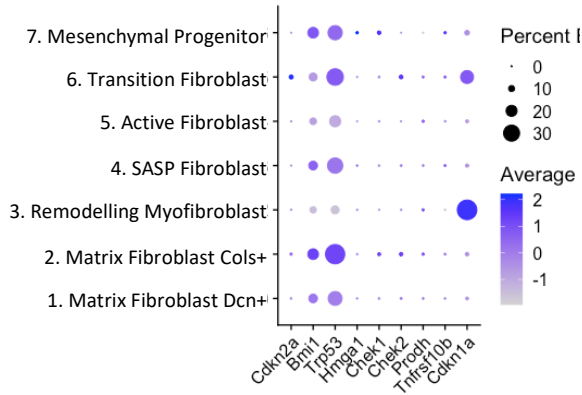

B) Senescence Effector Genes

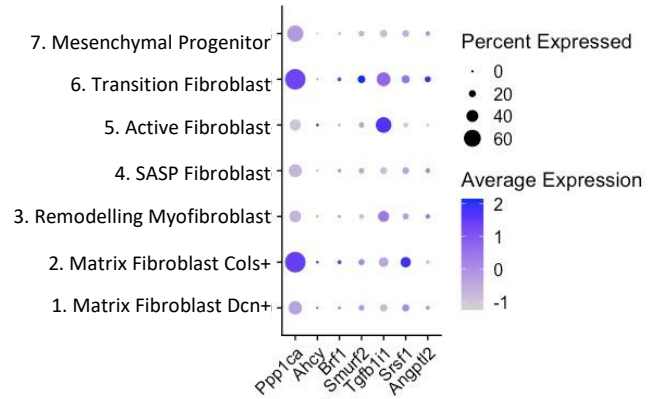

C) SASP Genes

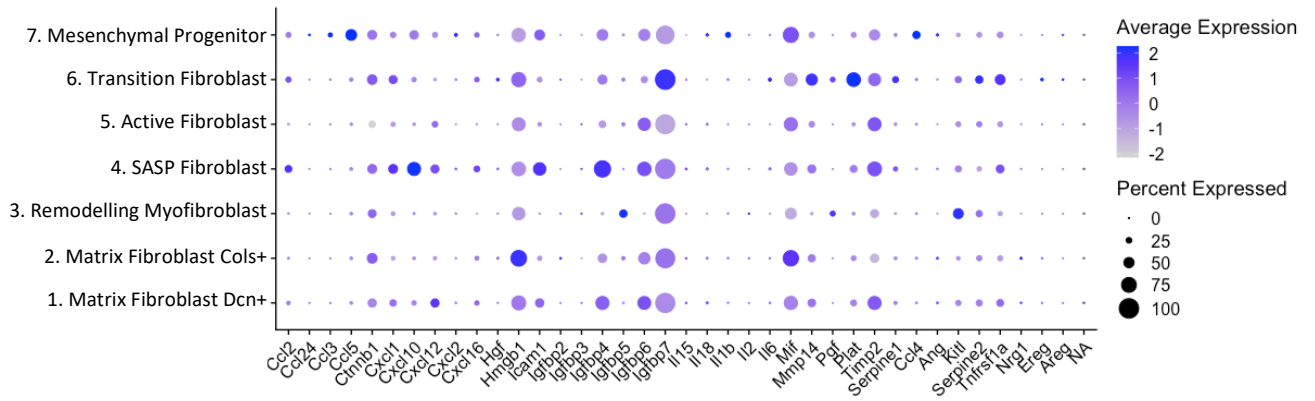

**Supplemental Figure 2: Expression of senescence-related genes in fibroblasts revealed higher SASP expression in fibroblast cluster 4**

Analysis of specific genes associated with (A) senescence core genes, (B) senescence effector genes, and (C) senescence-associated secretory phenotype (SASP) genes in fibroblasts showing the average expression from grey to blue and the percentage of cells in each cluster that expressed the genes by the dot size.

A) Membrane Transporters Involved in Metformin Pharmacokinetics

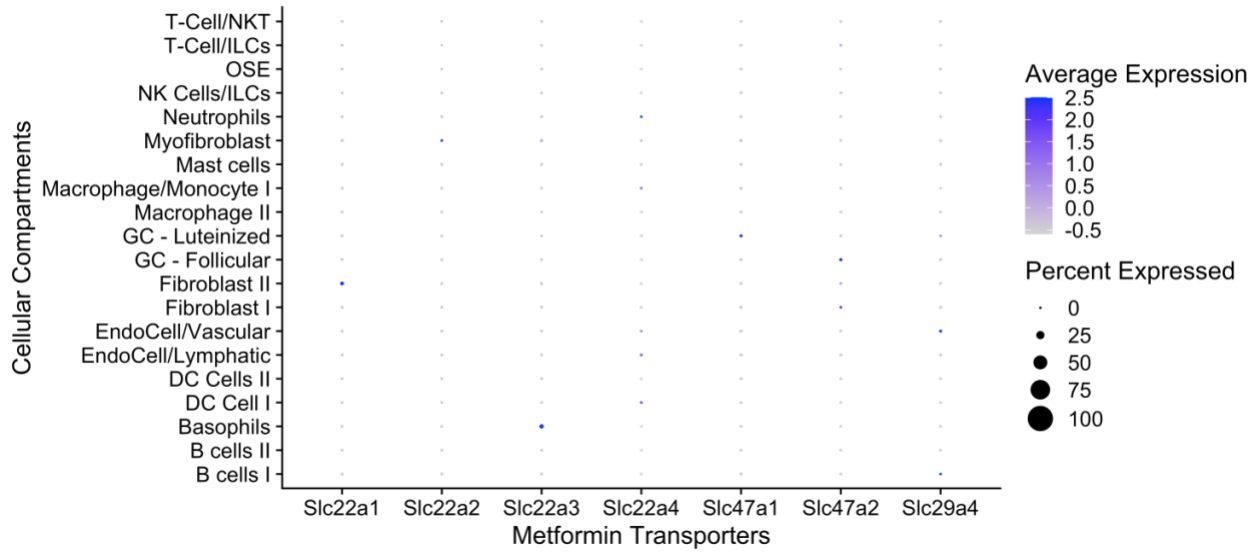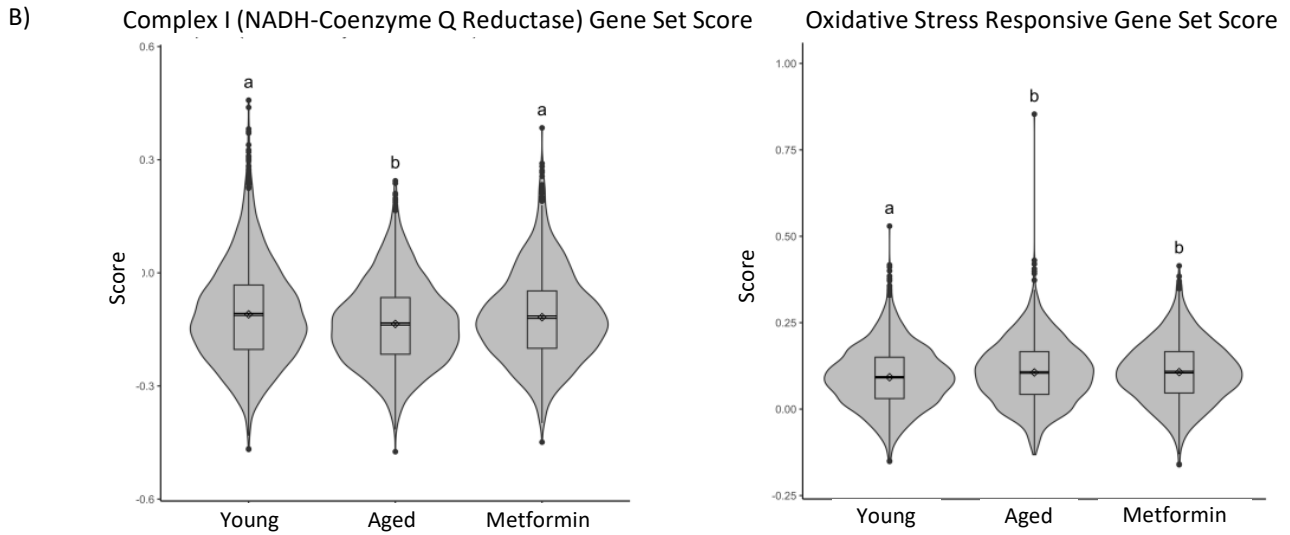

**Supplemental Figure 3: Effects of metformin may be indirect in the mouse ovary**

(A) Gene expression of known membrane transporters involved in metformin transport showing the average expression from grey to blue and the percentage of cells in each cluster that expressed the genes by the dot size. (B) Module score for Complex I (NADH-Coenzyme Q Reductase) gene set, and Oxidative Stress Responsive gene set in fibroblasts. Different letters above error bars (means  $\pm$  SEM) indicate significant differences ( $p < 0.05$ ) among groups (Tukey's posthoc test).

**Supplemental Table 1:** Flow sorting data of immune and non-immune cell proportion

| <b>Group</b>         | <b>CD45- Cells</b> | <b>CD45+ Cells</b> | <b>Total Cells</b> | <b>Percentage CD45+ Cells</b> |
|----------------------|--------------------|--------------------|--------------------|-------------------------------|
| Young 3m             | 307000             | 33000              | 340000             | 9.7                           |
| Middle Aged 14m      | 80000              | 29000              | 109000             | 26.6                          |
| Aged 20m             | 45880              | 13200              | 59080              | 22.3                          |
| Aged 20m + Metformin | 142000             | 28000              | 170000             | 16.5                          |
| Aged 24m             | 1750               | 1100               | 2850               | 38.6                          |
| Aged 24m + Metformin | 76000              | 32000              | 108000             | 29.6                          |

**Supplemental Table 2:** List of Differentially Expressed Genes in fibroblast clusters

**Supplemental Table 3:** List of PANTHER pathways from the overrepresentation test of fibroblast clusters

**Supplemental Table 4:** List of Differentially Expressed Genes in macrophage III

**Supplemental Table 5:** List of all Ligand-Receptors identified from LIANA analysis
